# Supplementary material
Source: publisher figshare collection journal article supplement (https://tandf.figshare.com/ndownloader/files/15135398)
Supplement: Supplementary file 1 [file 15135398]

| **Time point** | **T= 0 hours** | **T= 2 hours** | **T= 4 hours** | **T= 6 hours** | **T= 22 hours** | **T= 24 hours** | **T= 0 hours** | **T= 2 hours** | **T= 4 hours** | **T= 6 hours** | **T= 22 hours** | **T= 24 hours** | **T= 0 hours** | **T= 2 hours** | **T= 4 hours** | **T= 6 hours** | **T= 22 hours** | **T= 24 hours** | **T= 0 hours** | **T= 2 hours** | **T= 4 hours** | **T= 6 hours** | **T= 22 hours** | **T= 24 hours** |
| --- | --- | --- | --- | --- | --- | --- | --- | --- | --- | --- | --- | --- | --- | --- | --- | --- | --- | --- | --- | --- | --- | --- | --- | --- |
| **Subject 1** | ***E2WD*** | ***E2WD*** | ***E2WD*** | ***E2WD*** | ***E2WD*** | ***E2WD*** | ***NET*** | ***NET*** | ***NET*** | ***NET*** | ***NET*** | ***NET*** | ***E2WD*** | ***E2WD*** | ***E2WD*** | ***E2WD*** | ***E2WD*** | ***E2WD*** | ***NET*** | ***NET*** | ***NET*** | ***NET*** | ***NET*** | ***NET*** |
| E2 (pg/ml) | 597 | 197 | 103 | 90 | 10 | 6 | 378 | 465 | 379 | 414 | 218 | 273 | 198 | 125 | 61 | 48 | 9 | <5 | 210 | 219 | 367 | 232 | 125 | 135 |
| P4 (ng/ml) | 0.36 | 0.20 | 0.10 | 0.08 | 0.28 | 0.40 | 0.16 | 0.36 | 0.21 | 0.09 | 0.23 | 0.37 | 0.06 | 0.16 | 0.26 | 0.10 | 0.62 | 0.28 | 0.20 | 0.26 | 0.12 | 0.07 | 0.15 | 0.30 |
| NET (ng/ml) |  |  |  |  |  |  | <0.02 | 3.404 | 1.591 | 1.154 | 0.287 | 0.207 |  |  |  |  |  |  | <0.02 | 3.124 | 1.335 | 0.952 | 0.208 | 0.158 |
| **Mucus Score** |  |  |  |  |  |  |  |  |  |  |  |  |  |  |  |  |  |  |  |  |  |  |  |  |
| Consistency | 3 | 2 | 2 | 2 | 3 | 2 | 3 | 3 | 2 | 2 | 2 | 2 | 3 | 2 | 2 | 2 | 3 | 3 | 3 | 3 | 3 | 2 | 3 | 3 |
| Ferning | 3 | 3 | 3 | 3 | 3 | 3 | 3 | 3 | 3 | 3 | 3 | 3 | 3 | 3 | 3 | 3 | 3 | 3 | 3 | 3 | 3 | 3 | 3 | 3 |
| Spinnbarkeit | 3 | 3 | 2 | 2 | 3 | 2 | 2 | 3 | 1 | 1 | 3 | 2 | 3 | 1 | 2 | 1 | 2 | 2 | 3 | 2 | 3 | 2 | 3 | 3 |
| Cellularity | 3 | 1 | 1 | 0 | 0 | 0 | 0 | 1 | 0 | 0 | 0 | 0 | 1 | 1 | 0 | 0 | 1 | 1 | 2 | 1 | 1 | 0 | 2 | 2 |
| Volume | 1 | 1 | 1 | 1 | 3 | 1 | 1 | 1 | 1 | 0 | 1 | 1 | 3 | 1 | 1 | 0 | 2 | 2 | 1 | 0 | 1 | 0 | 2 | 1 |
| **Total** | 13 | 10 | 9 | 8 | 12 | 8 | 9 | 11 | 7 | 6 | 9 | 8 | 13 | 8 | 8 | 6 | 11 | 11 | 12 | 9 | 11 | 7 | 13 | 12 |
|  |  |  |  |  |  |  |  |  |  |  |  |  |  |  |  |  |  |  |  |  |  |  |  |  |
| **Subject 2** | ***E2WD*** | ***E2WD*** | ***E2WD*** | ***E2WD*** | ***E2WD*** | ***E2WD*** | ***NET*** | ***NET*** | ***NET*** | ***NET*** | ***NET*** | ***NET*** | ***E2WD*** | ***E2WD*** | ***E2WD*** | ***E2WD*** | ***E2WD*** | ***E2WD*** | ***NET*** | ***NET*** | ***NET*** | ***NET*** | ***NET*** | ***NET*** |
| E2 (pg/ml) | 190 | 182 | 210 | 231 | 130 | 171 | 684 | 148 | 75 | 46 | <5 | <5 | 530 | 154 | 53 | 34 | <5 | <5 | 354.10 | 321.40 | 332.10 | 298.30 | 182.80 | 252.70 |
| P4 (ng/ml) | 0.09 | 0.21 | 0.08 | 0.11 | 0.12 | 0.09 | 0.12 | 0.07 | 0.08 | 0.07 | 0.18 | 0.08 | 0.10 | 0.15 | 0.10 | 0.06 | 0.21 | 0.12 | 0.15 | 0.07 | 0.15 | 0.10 | 0.17 | 0.09 |
| NET (ng/ml) | <0.02 | 3.070 | 1.910 | 1.510 | 0.160 | 0.130 |  |  |  |  |  |  |  |  |  |  |  |  | <0.02 | 4.680 | 2.270 | 1.380 | 0.120 | 0.090 |
| **Mucus Score** |  |  |  |  |  |  |  |  |  |  |  |  |  |  |  |  |  |  |  |  |  |  |  |  |
| Consistency | 2 | 2 | 2 | 2 | 1 | 1 | 3 | 3 | 2 | 2 | 1 | 2 | 3 | 3 | 3 | 3 | 3 | 3 | 3 | 2 | 2 | 2 | 2 | 1 |
| Ferning | 3 | 2 | 2 | 2 | 1 | 3 | 3 | 3 | 3 | 3 | 3 | 3 | 3 | 3 | 3 | 3 | 3 | 3 | 3 | 3 | 3 | 3 | 3 | 3 |
| Spinnbarkeit | 1 | 2 | 2 | 2 | 1 | 1 | 3 | 2 | 2 | 2 | 1 | 2 | 2 | 3 | 2 | 2 | 2 | 3 | 3 | 1 | 2 | 1 | 1 | 1 |
| Cellularity | 2 | 2 | 1 | 1 | 1 | 1 | 2 | 2 | 2 | 2 | 0 | 0 | 2 | 2 | 2 | 0 | 0 | 0 | 2 | 1 | 1 | 1 | 2 | 2 |
| Volume | 2 | 0 | 1 | 1 | 1 | 1 | 2 | 1 | 1 | 0 | 0 | 1 | 2 | 1 | 0 | 0 | 2 | 2 | 3 | 2 | 1 | 1 | 2 | 1 |
| **Total** | 10 | 8 | 8 | 8 | 5 | 7 | 13 | 11 | 10 | 9 | 5 | 8 | 12 | 12 | 10 | 8 | 10 | 11 | 14 | 9 | 9 | 8 | 10 | 8 |
|  |  |  |  |  |  |  |  |  |  |  |  |  |  |  |  |  |  |  |  |  |  |  |  |  |
| **Subject 3** | ***E2WD*** | ***E2WD*** | ***E2WD*** | ***E2WD*** | ***E2WD*** | ***E2WD*** | ***NET*** | ***NET*** | ***NET*** | ***NET*** | ***NET*** | ***NET*** | ***E2WD*** | ***E2WD*** | ***E2WD*** | ***E2WD*** | ***E2WD*** | ***E2WD*** | ***NET*** | ***NET*** | ***NET*** | ***NET*** | ***NET*** | ***NET*** |
| E2 (pg/ml) | 134.5 | 136.9 | 127.4 | 67.82 | 46.81 | 54.81 | 236.4 | 346.9 | 340.8 | 354.6 | 105.4 | 67.97 | 653.1 | 195.6 | 82 | 43.91 | 11.49 | 8.4 | 245.8 | 124.7 | 69.96 | 39.46 | 13.72 | 12.9 |
| P4 (ng/ml) | 0.129 | 0.109 | 0.162 | 0.126 | 0.214 | 0.15 | 0.146 | 0.178 | 0.266 | 0.243 | 0.224 | 0.16 | 0.149 | 0.166 | 0.212 | 0.21 | 0.144 | 0.16 | 0.138 | 0.099 | 0.19 | 0.167 | 0.179 | 0.117 |
| NET (ng/ml) | <0.02 | 2.080 | 1.160 | 0.590 | 0.080 | 0.050 | <0.02 | 1.450 | 1.090 | 0.660 | 0.090 | 0.060 |  |  |  |  |  |  |  |  |  |  |  |  |
| **Mucus Score** |  |  |  |  |  |  |  |  |  |  |  |  |  |  |  |  |  |  |  |  |  |  |  |  |
| Consistency | 3 | 1 | 3 | 2 | 2 | 2 | 1 | 1 | 0 | 1 | 2 | 2 | 3 | 3 | 3 | 3 | 3 | 3 | 2 | 2 | 2 | 2 | 2 | 2 |
| Ferning | 3 | 0 | 3 | 2 | 3 | 3 | 3 | 3 | 3 | 3 | 3 | 3 | 3 | 3 | 3 | 3 | 3 | 3 | 3 | 3 | 3 | 3 | 3 | 3 |
| Spinnbarkeit | 3 | 1 | 2 | 1 | 2 | 2 | 1 | 0 | 0 | 1 | 1 | 2 | 3 | 3 | 3 | 3 | 3 | 3 | 2 | 2 | 2 | 2 | 2 | 2 |
| Cellularity | 2 | 1 | 1 | 1 | 0 | 0 | 0 | 0 | 0 | 0 | 0 | 1 | 2 | 2 | 2 | 1 | 3 | 3 | 3 | 3 | 3 | 2 | 1 | 2 |
| Volume | 1 | 0 | 0 | 0 | 1 | 0 | 0 | 0 | 0 | 0 | 0 | 0 | 2 | 1 | 1 | 1 | 3 | 2 | 0 | 0 | 0 | 0 | 1 | 1 |
| **Total** | 12 | 3 | 9 | 6 | 8 | 7 | 5 | 4 | 3 | 5 | 6 | 8 | 13 | 12 | 12 | 11 | 15 | 14 | 10 | 10 | 10 | 9 | 9 | 10 |
